# Supplementary material for: Isolation and Identification of Two Novel Attractant Compounds from Chinese Cockroach (Eupolyphaga sinensis Walker) by Combination of HSCCC, NMR and CD Techniques
Source: MDPI journal article supplement (doi:10.3390/molecules180911299), 2013-09-13

# Supplementary Materials

## Contents

- Figure S1.**  $^1\text{H-NMR}$  in  $\text{CDCl}_3$  for compound **1**.
- Figure S2.**  $^{13}\text{C-NMR}$  in  $\text{CDCl}_3$  for compound **1**.
- Figure S3.** DEPT in  $\text{CDCl}_3$  for compound **1**.
- Figure S4.** COSY in  $\text{CDCl}_3$  for compound **1**.
- Figure S5.** HMQC in  $\text{CDCl}_3$  for compound **1**.
- Figure S6.** HMBC-1 in  $\text{CDCl}_3$  for compound **1**.
- Figure S7.** HMBC-2 in  $\text{CDCl}_3$  for compound **1**.
- Figure S8.**  $^1\text{H-NMR}$  in  $\text{CDCl}_3$  for compound **2**.
- Figure S9.**  $^{13}\text{C-NMR}$  in  $\text{CDCl}_3$  for compound **2**.
- Figure S10.** DEPT in  $\text{CDCl}_3$  for compound **2**.
- Figure S11.** COSY in  $\text{CDCl}_3$  for compound **2**.
- Figure S12.** HMQC in  $\text{CDCl}_3$  for compound **2**.
- Figure S13.** HMBC in  $\text{CDCl}_3$  for compound **2**.
- Figure S14.** HR-TOF-MS for compound **1**.
- Figure S15.** HR-TOF-MS for compound **2**.
- Figure S16.** CCC chromatogram.
- Figure S17.** CD spectrum for compound **1**.
- Figure S18.** CD spectrum for compound **2**.

Figure S1.  $^1\text{H-NMR}$  in  $\text{CDCl}_3$  for compound 1.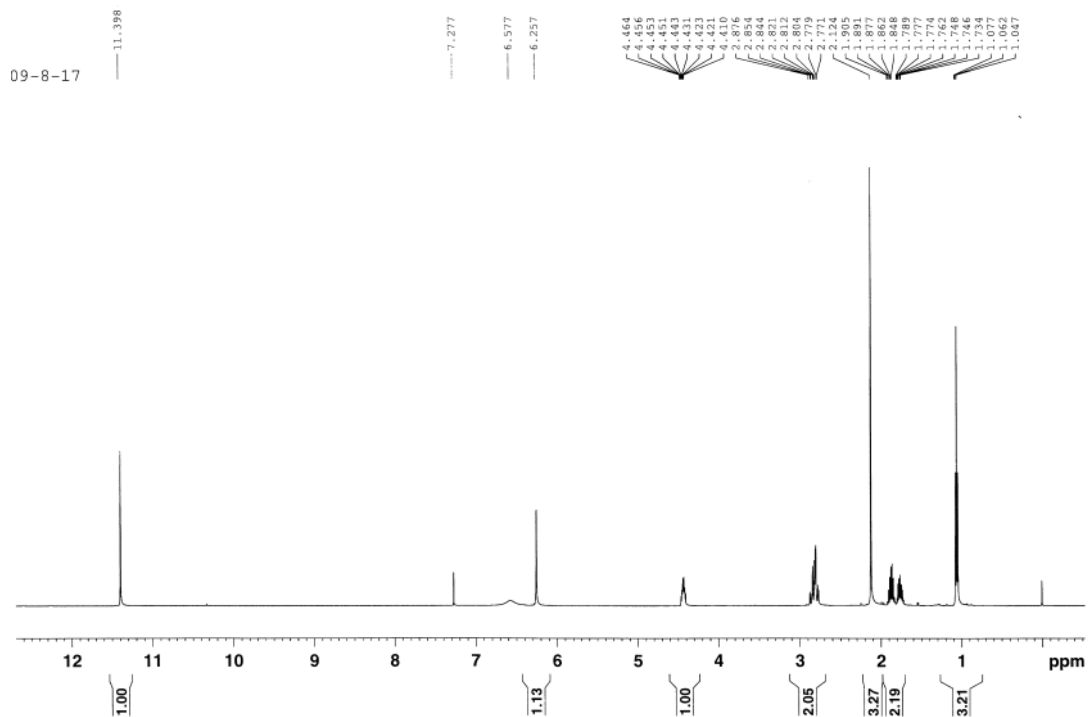Figure S2.  $^{13}\text{C-NMR}$  in  $\text{CDCl}_3$  for compound 1.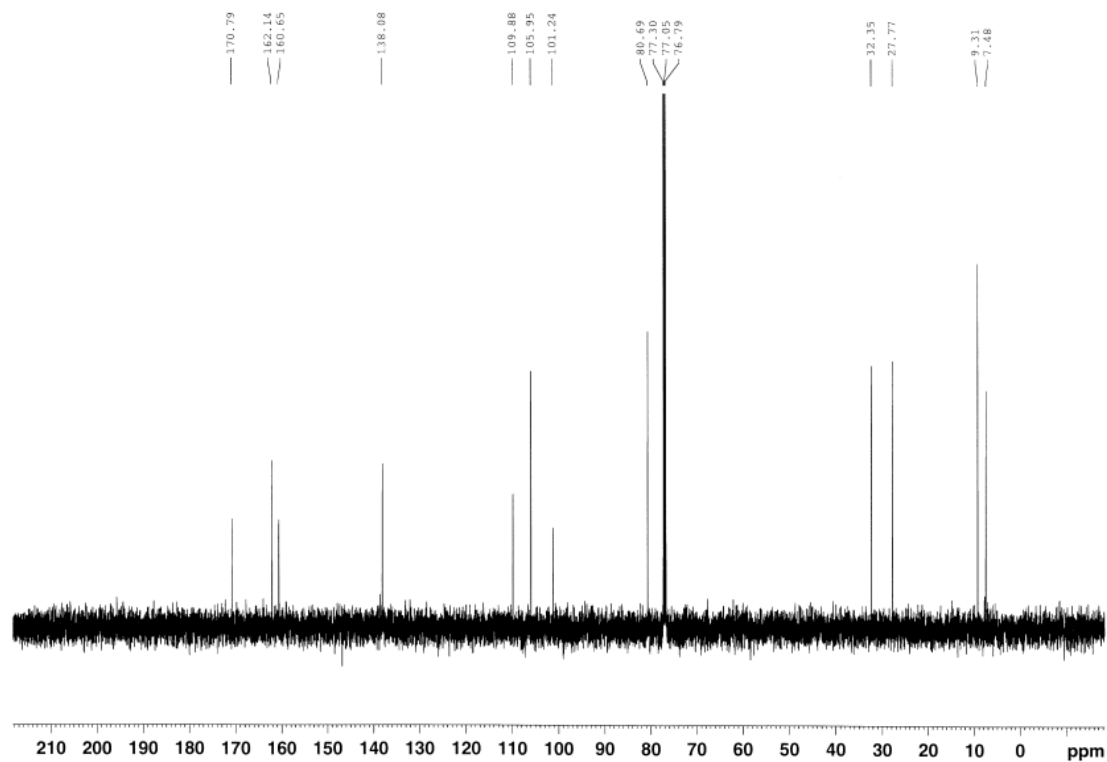

Figure S3. DEPT in CDCl<sub>3</sub> for compound 1.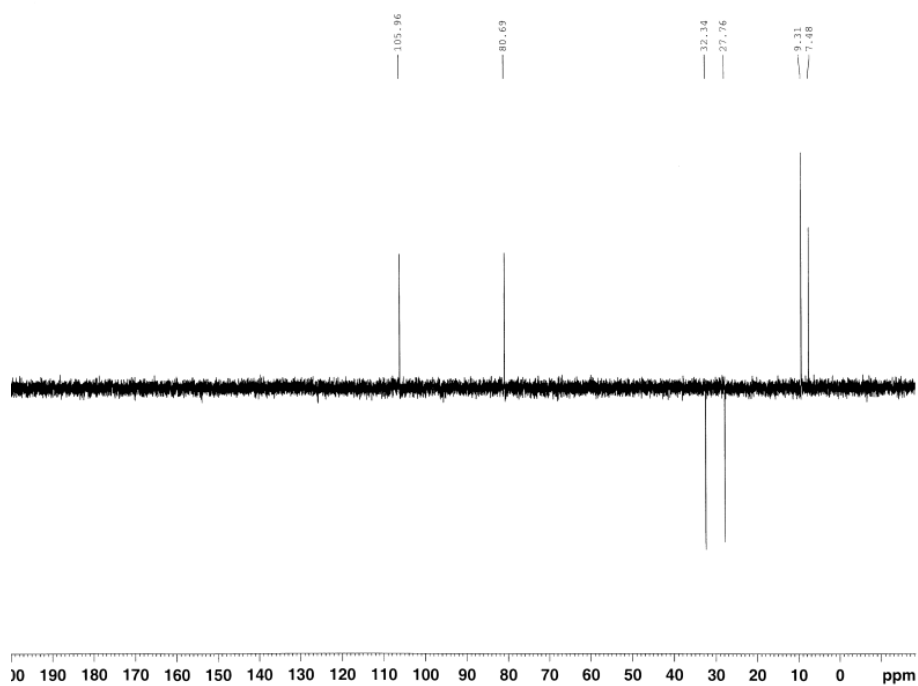Figure S4. COSY in CDCl<sub>3</sub> for compound 1.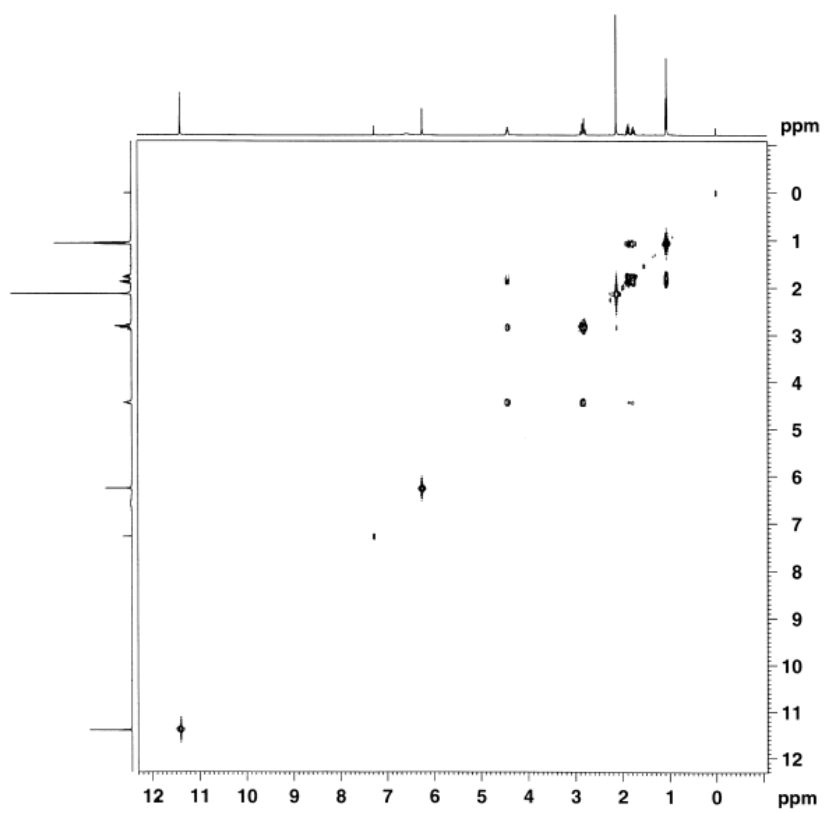

Figure S5. HMQC in CDCl<sub>3</sub> for compound 1.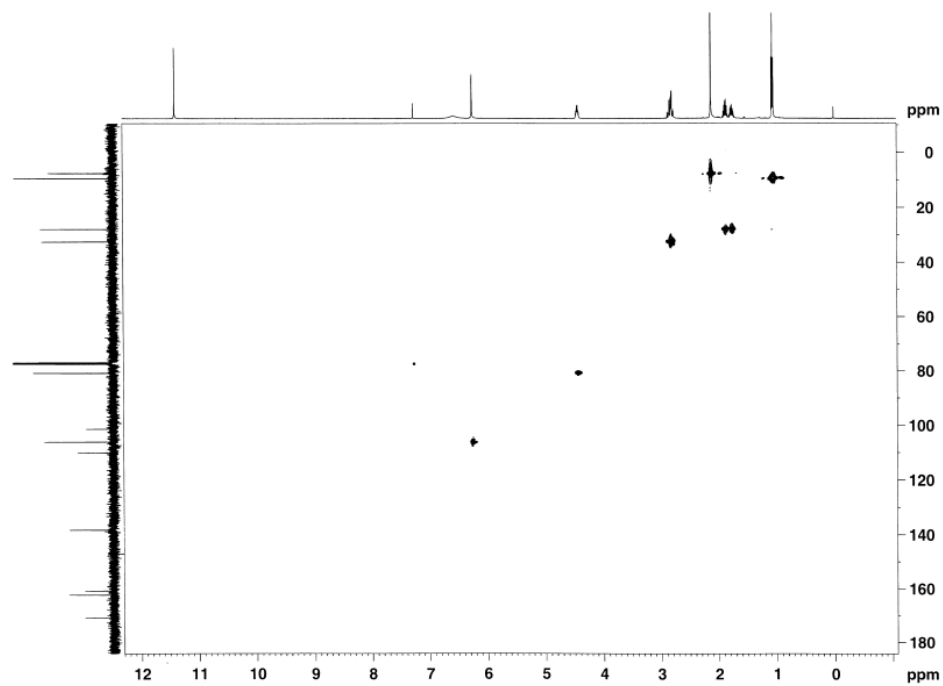Figure S6. HMBC-1 in CDCl<sub>3</sub> for compound 1.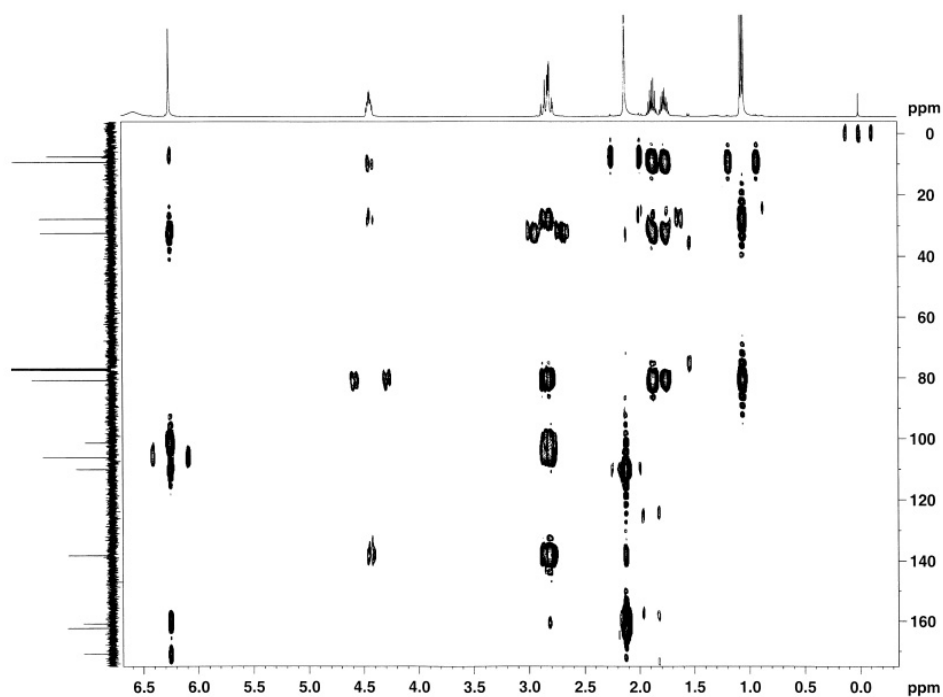

Figure S7. HMBC-2 in CDCl<sub>3</sub> for compound 1.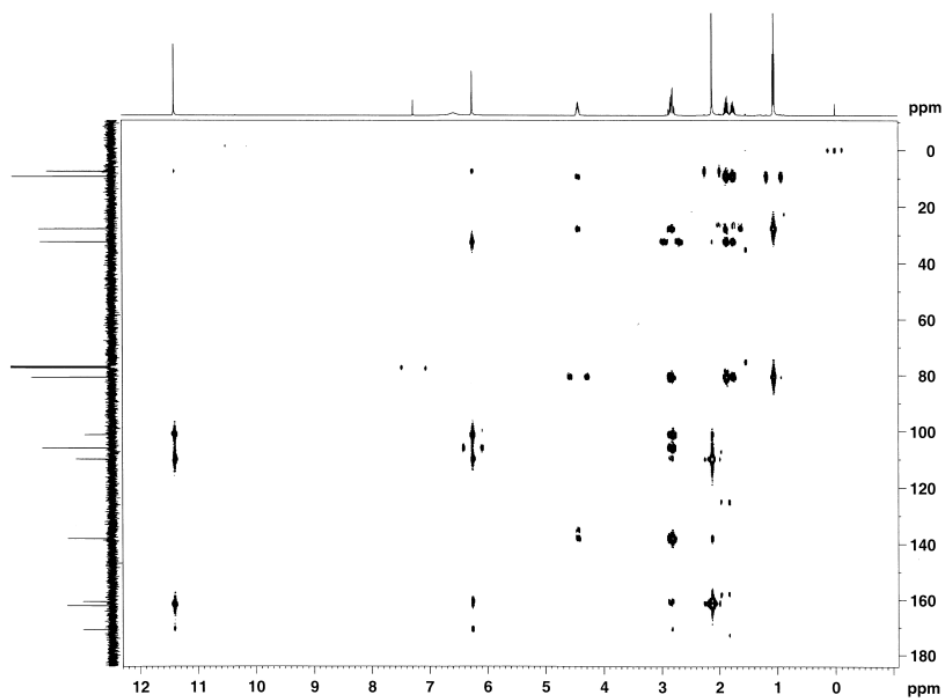Figure S8. <sup>1</sup>H-NMR in CDCl<sub>3</sub> for compound 2.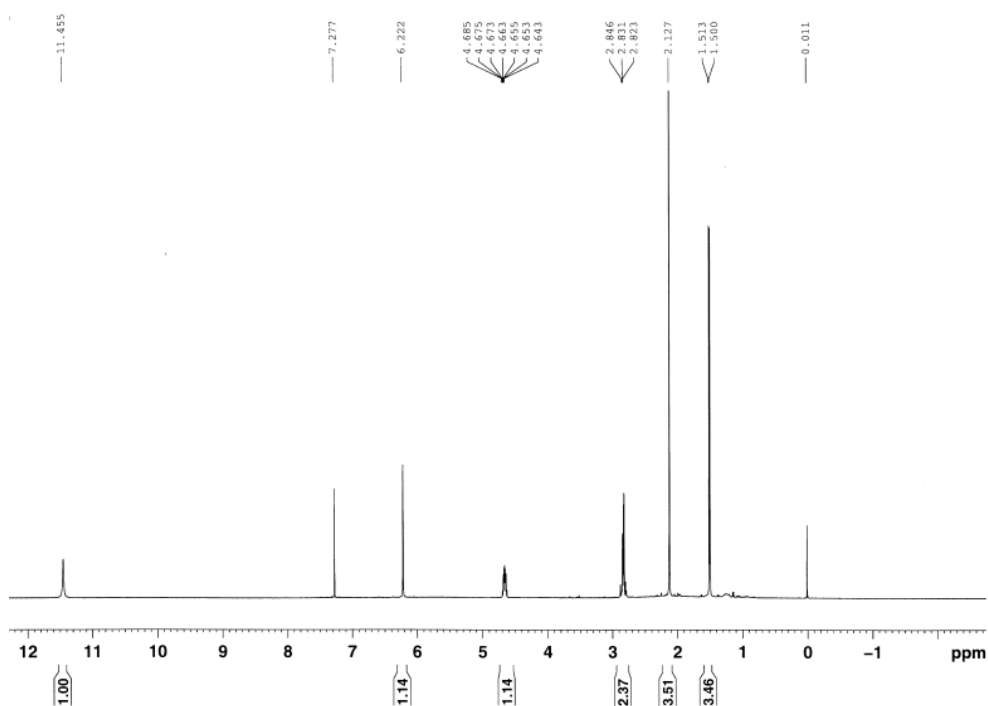

**Figure S9.**  $^{13}\text{C}$ -NMR in  $\text{CDCl}_3$  for compound 2.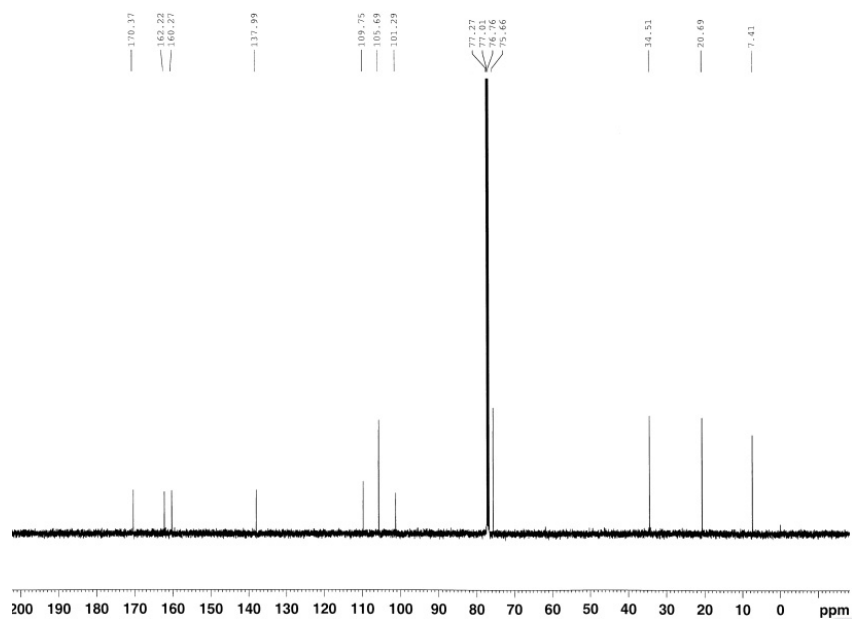**Figure S10.** DEPT in  $\text{CDCl}_3$  for compound 2.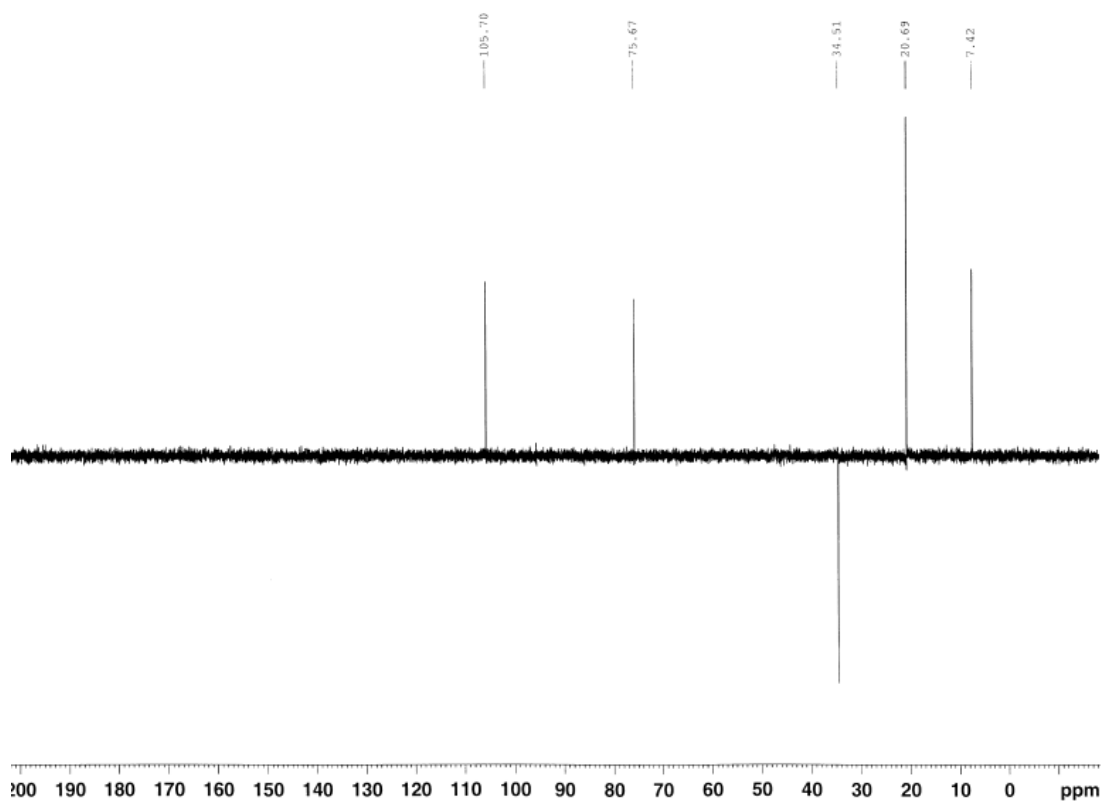

**Figure S11.** COSY in CDCl<sub>3</sub> for compound 2.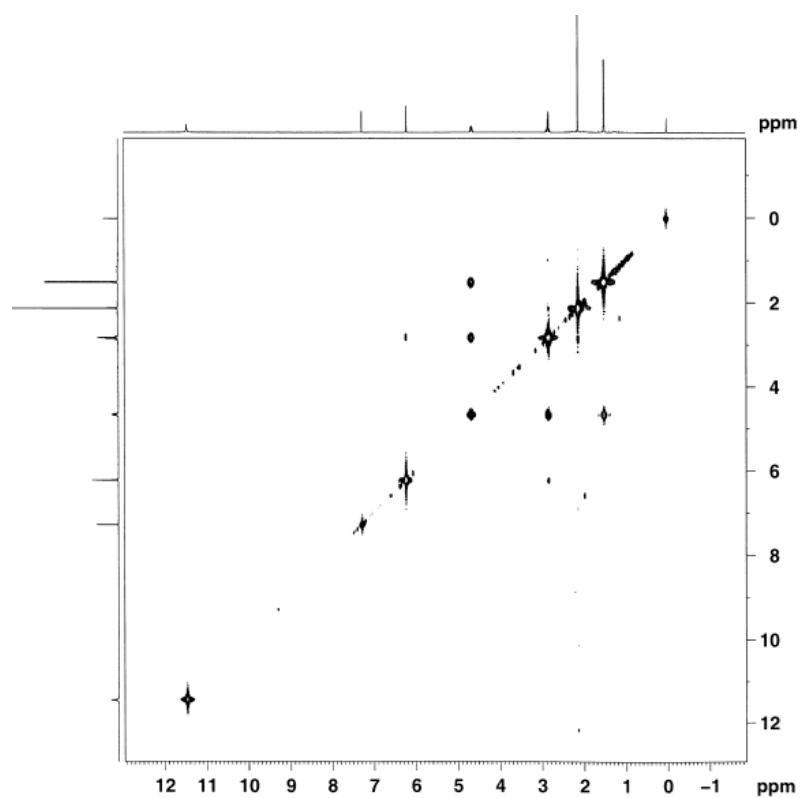**Figure S12.** HMQC in CDCl<sub>3</sub> for compound 2.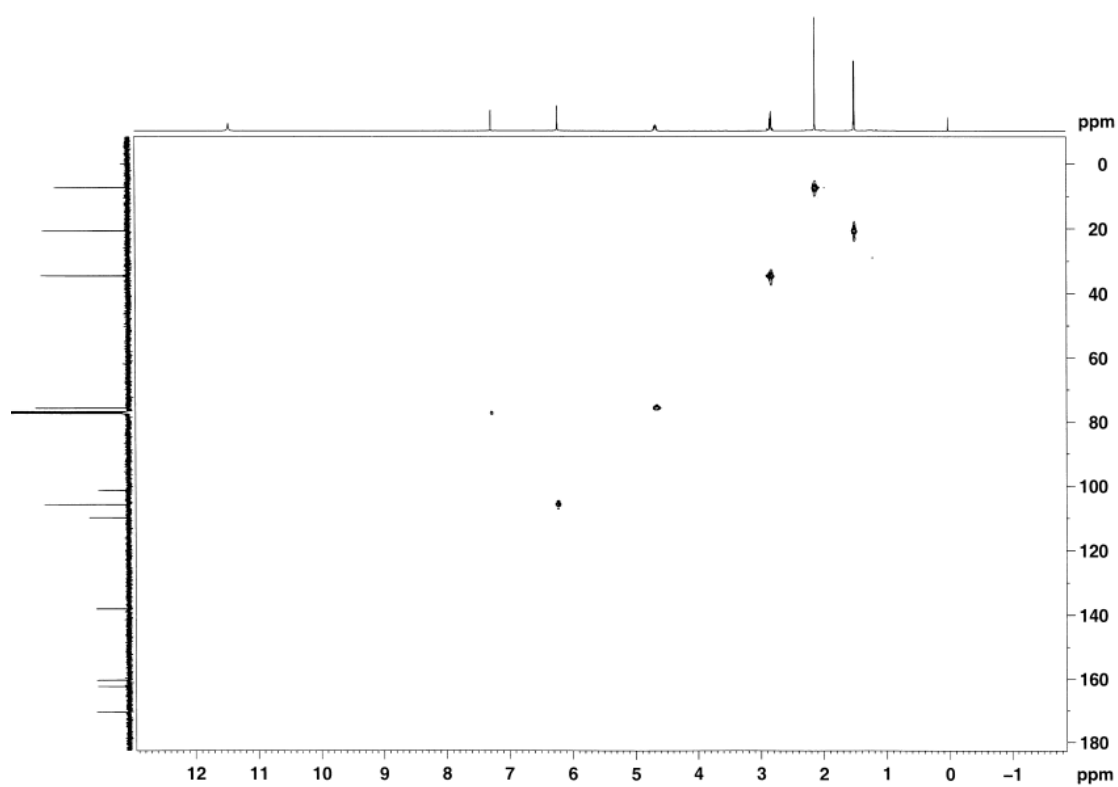

Figure S13. HMBC in CDCl<sub>3</sub> for compound 2.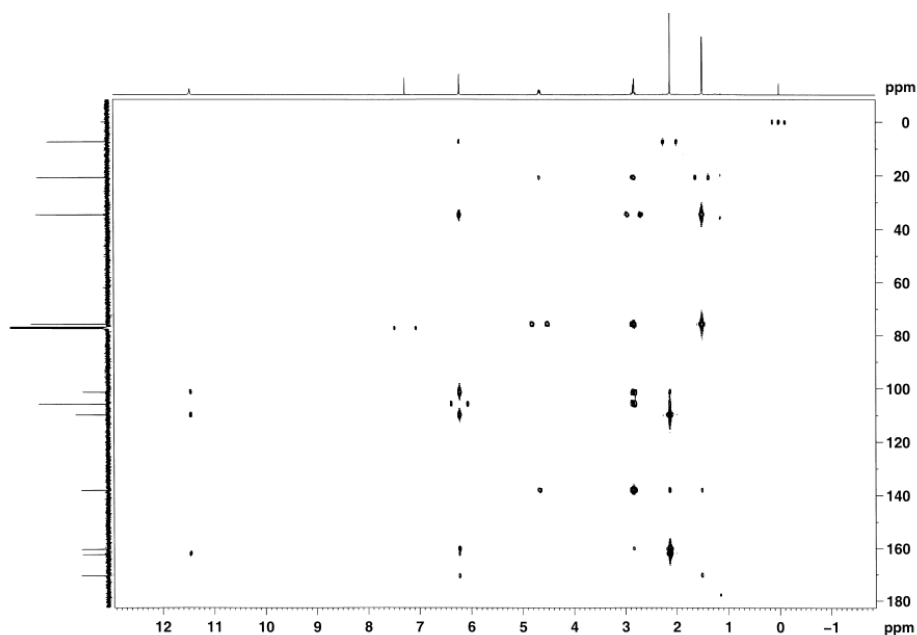

Figure S14. HR-TOF-MS for compound 1.

## Elemental Composition Report

## Single Mass Analysis

Tolerance = 20.0 PPM / DBE: min = -1.5, max = 50.0

Element prediction: Off

Monoisotopic Mass, Odd and Even Electron Ions

10 formula(e) evaluated with 1 results within limits (up to 50 closest results for each mass)

Elements Used:

C: 0-20 H: 0-20 O: 0-5

09-8-1 1529 (9.905) Cm (1529:1533-1481:1500)

TOF MS Cl<sup>+</sup>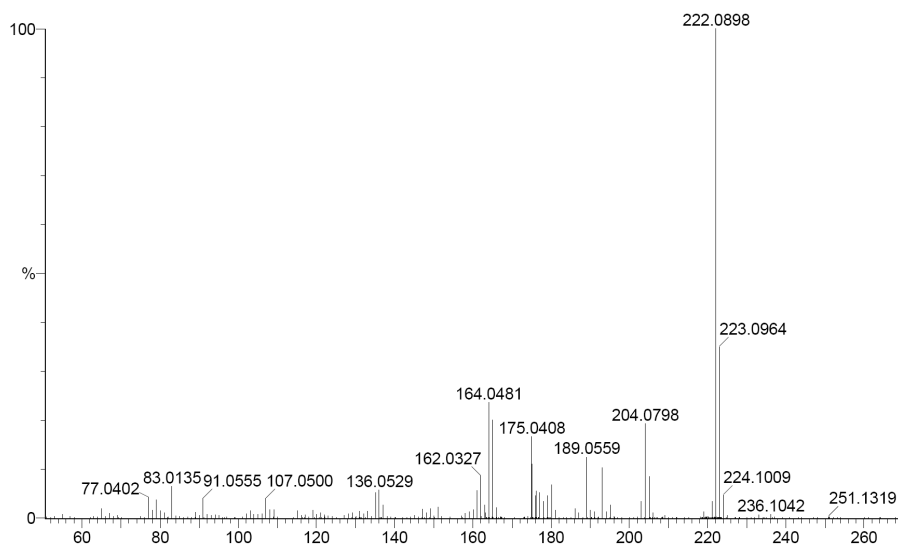

Minimum: -1.5  
 Maximum: 3.0 20.0 50.0

| Mass     | Calc. Mass | mDa | PPM | DBE | i-FIT | Formula    |
|----------|------------|-----|-----|-----|-------|------------|
| 222.0898 | 222.0892   | 0.6 | 2.7 | 6.0 | 676.3 | C12 H14 O4 |



**Figure S15.** HR-TOF-MS for compound 2.**Single Mass Analysis**

Tolerance = 20.0 PPM / DBE: min = -1.5, max = 50.0

Element prediction: Off

Monoisotopic Mass, Odd and Even Electron Ions

12 formula(e) evaluated with 1 results within limits (up to 50 closest results for each mass)

Elements Used:

C: 0-20 H: 0-20 O: 0-5

09-8-1 1457 (9.545) Cm (1455:1462-1411:1435)

TOF MS CI+

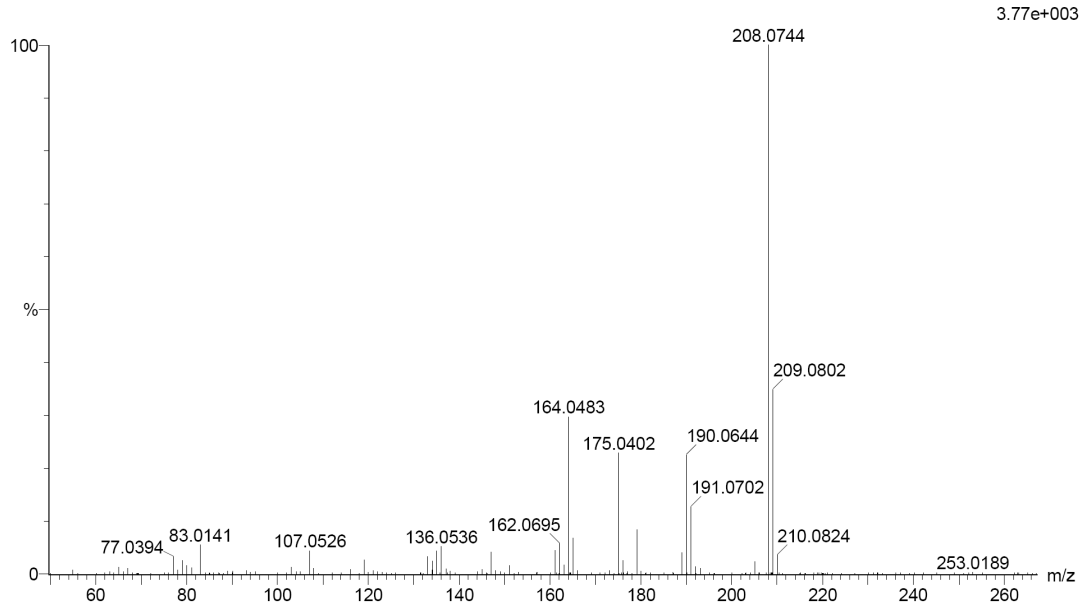

Minimum:

Maximum:

3.0

20.0

-1.5

50.0

| Mass     | Calc. Mass | mDa | PPM | DBE | i-FIT | Formula    |
|----------|------------|-----|-----|-----|-------|------------|
| 208.0744 | 208.0736   | 0.8 | 3.8 | 6.0 | 274.1 | C11 H12 O4 |

**Figure S16.** CCC chromatogram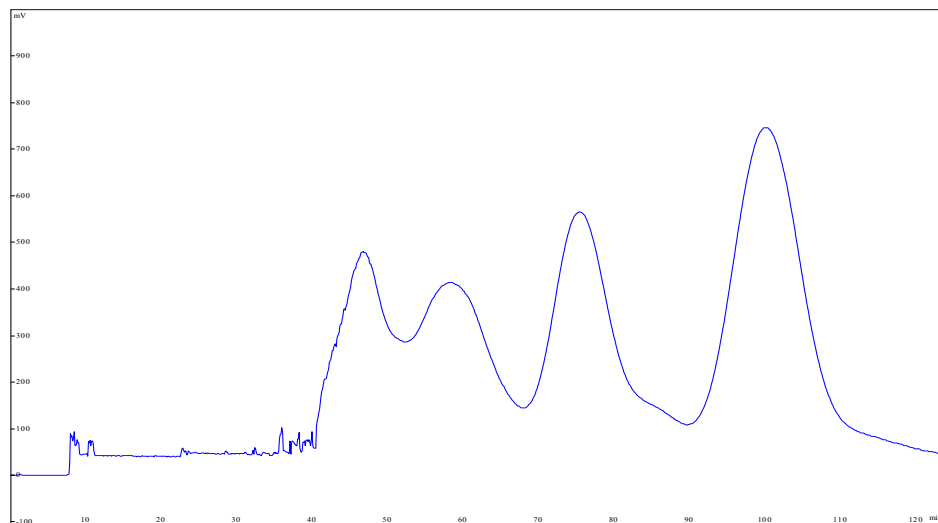

**Figure S17.** CD spectrum for compound 1.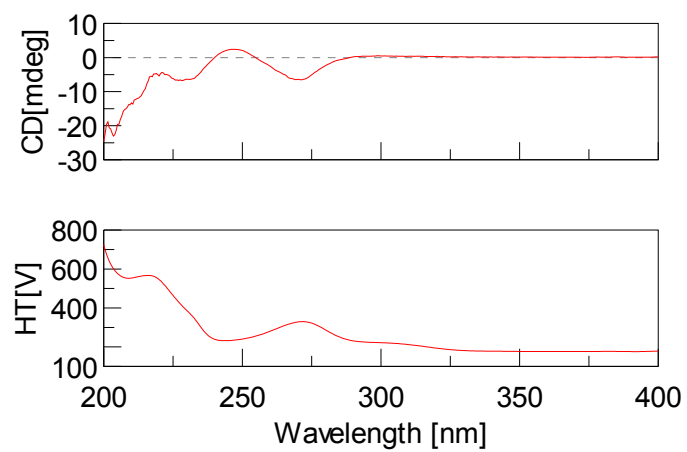**Figure S18.** CD spectrum for compound 2.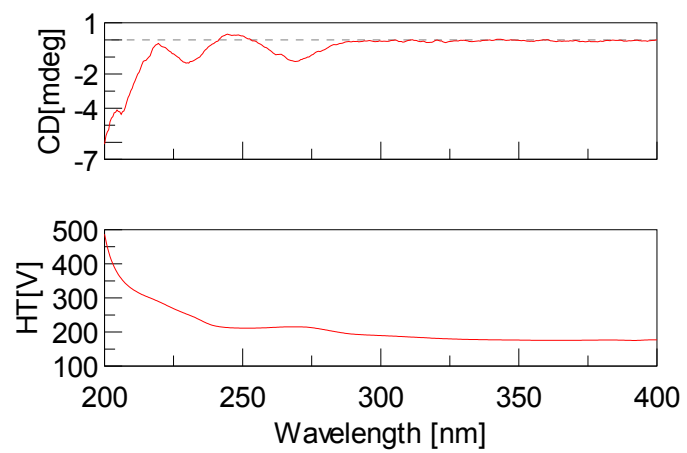

Supplement: s1 [file s1]
